# Supplementary material for: Gene Transfer of Skeletal Muscle-Type Myosin Light Chain Kinase via Adeno-Associated Virus 6 Improves Muscle Functions in an Amyotrophic Lateral Sclerosis Mouse Model
Source: MDPI journal article supplement (doi:10.3390/ijms23031747), 2022-02-03
Supplement: s1 [file s1]

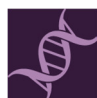

Article

# Gene Transfer of Skeletal Muscle-Type Myosin Light Chain Kinase via Adeno-Associated Virus 6 Improves Muscle Functions in an Amyotrophic Lateral Sclerosis Mouse Model

Ryohei Oya <sup>1,2</sup>, Osamu Tsukamoto <sup>1,\*</sup>, Tatsuro Hitsumoto <sup>1</sup>, Naoya Nakahara <sup>3</sup>, Chisato Okamoto <sup>1</sup>, Ken Matsuoka <sup>1</sup>, Hisakazu Kato <sup>1</sup>, Hidenori Inohara <sup>2</sup> and Seiji Takashima <sup>1</sup>

<sup>1</sup> Department of Medical Biochemistry, Osaka University Graduate School of Medicine/Frontier Biosciences, Osaka, 565-0871 Japan; roya@ent.med.osaka-u.ac.jp (R.O.); hituhituhitu@gmail.com (T.H.); saiseikaichisato@gmail.com (C.O.); kmatsuoka@medbio.med.osaka-u.ac.jp (K.M.); katohisaka@medbio.med.osaka-u.ac.jp (H.K.); takasima@cardiology.med.osaka-u.ac.jp (S.T.)

<sup>2</sup> Department of Otorhinolaryngology Head and Neck Surgery, Osaka University Graduate School of Medicine, Osaka, 565-0871 Japan; hinohara@ent.med.osaka-u.ac.jp

<sup>3</sup> Department of Molecular Physiology, The Jikei University School of Medicine, Tokyo, 105-8461 Japan; nkhr@jikei.ac.jp

\* Correspondence: tsuka@madbio.med.osaka-u.ac.jp; Tel.: +81-6-6879-3492; Fax: +81-6-6879-3493

**Citation:** Oya, R.; Tsukamoto, O.; Hitsumoto, T.; Nakahara, N.; Okamoto, C.; Matsuoka, K.; Kato, H.; Inohara, H.; Takashima, S. Gene Transfer of Skeletal Muscle-Type Myosin Light Chain Kinase via Adeno-Associated Virus 6 Improves Muscle Functions in an Amyotrophic Lateral Sclerosis Mouse Model. *Int. J. Mol. Sci.* **2022**, *23*, 1747. <https://doi.org/10.3390/ijms23031747>

Academic Editor: Thomas C. Irving

Received: 28 December 2021

Accepted: 1 February 2022

Published: 3 February 2022

**Publisher's Note:** MDPI stays neutral with regard to jurisdictional claims in published maps and institutional affiliations.

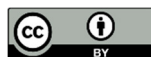

**Copyright:** © 2022 by the authors. Licensee MDPI, Basel, Switzerland. This article is an open access article distributed under the terms and conditions of the Creative Commons Attribution (CC BY) license (<http://creativecommons.org/licenses/by/4.0/>).

**Table S1.** The cross-sectional area of isolated EDL muscle among each experiment.

|                             | <b>Sham Side</b>              | <b>AAV Side</b>               | <b><i>p</i> Value</b> |
|-----------------------------|-------------------------------|-------------------------------|-----------------------|
| WT mice for control vector  | $0.82 \pm 0.083 \text{ mm}^2$ | $0.85 \pm 0.033 \text{ mm}^2$ | 0.32                  |
| WT mice for skMLCK vector   | $0.84 \pm 0.030 \text{ mm}^2$ | $0.86 \pm 0.040 \text{ mm}^2$ | 0.20                  |
| SOD mice for control vector | $0.83 \pm 0.052 \text{ mm}^2$ | $0.82 \pm 0.039 \text{ mm}^2$ | 0.20                  |
| SOD mice for skMLCK vector  | $0.83 \pm 0.069 \text{ mm}^2$ | $0.84 \pm 0.088 \text{ mm}^2$ | 0.42                  |

Data was expressed as means  $\pm$  standard deviation, and analyzed by student's T test.
